# Supplementary material for: The Impact of Ambient Temperature on Cardiorespiratory Mortality in Northern Greece
Source: MDPI journal article supplement (doi:10.3390/ijerph20010555), 2022-12-29
Supplement: s1 [file s1]

**Table S1:** Characteristics of the 3 meteorological stations used.

|                                     | Station 1 | Station 2 | Station 3 |
|-------------------------------------|-----------|-----------|-----------|
| Longitude                           | 25 56 E   | 24 36 E   | 24 25 E   |
| Latitude                            | 40 51 N   | 40 56 N   | 41 06 N   |
| Elevation (m)                       | 3.5       | 4.2       | 86.9      |
| Minimum mean daily temperature (°C) | -6.9      | -4.1      | -11.2     |
| Maximum mean daily temperature (°C) | 34.3      | 32.5      | 37.3      |
| Average mean daily temperature (°C) | 16.2      | 16        | 16.5      |
| Minimum RH (%)                      | 16.4      | 16.3      | 16.3      |
| Maximum RH (%)                      | 100       | 100       | 100       |
| Minimum wind speed (m/s)            | 0         | 0         | 0         |
| Maximum wind speed (m/s)            | 20.8      | 18        | 37.7      |

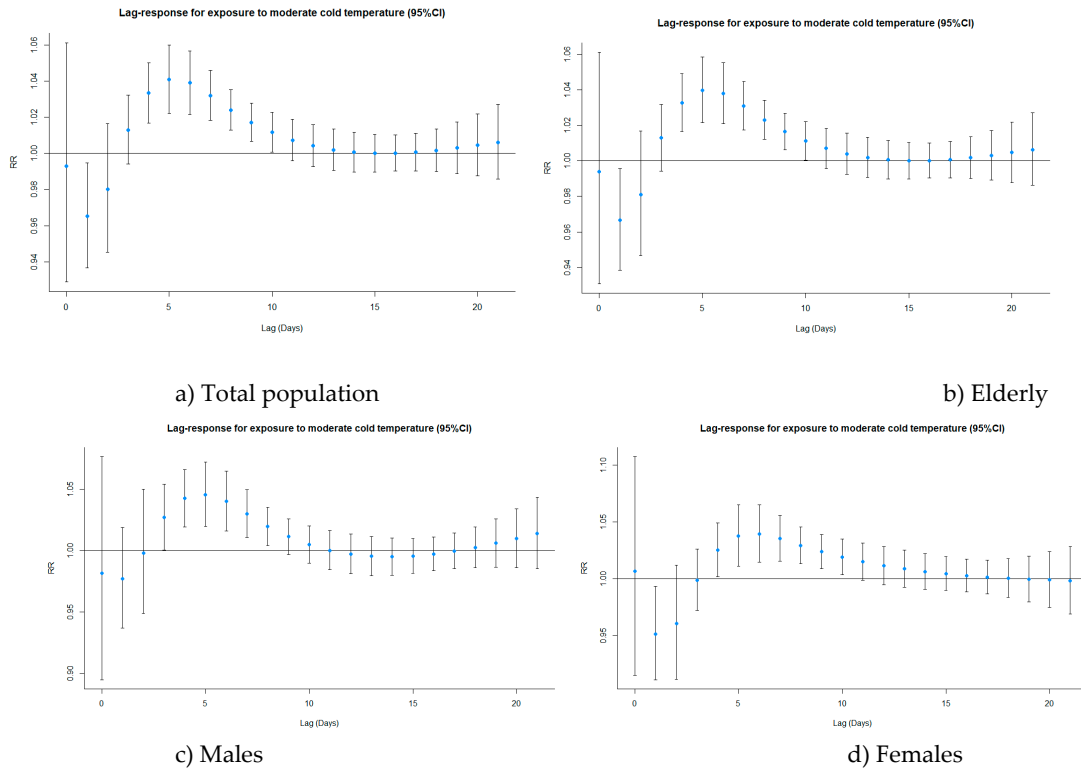

**Fig. S1** Lag-response curves for exposure to moderately cold temperatures (95% CI) for (a) the total population, (b) the elderly, (c) males, and (d) females.

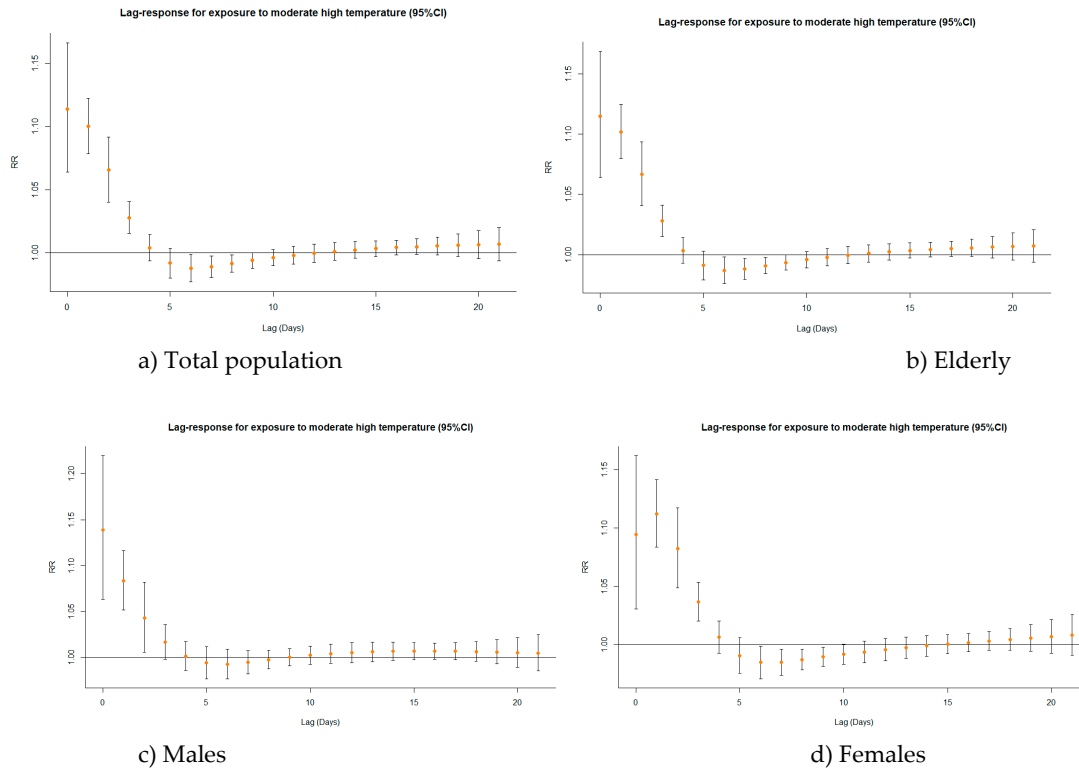

**Fig. S2** Lag-response curves for exposure to moderately hot temperatures (95% CI) for (a) the total population, (b) the elderly, (c) males, and (d) females.

**Table S2:** The number of cardiorespiratory deaths (AN) attributed to air temperature and the fraction of cardiorespiratory mortality (AF) attributed to cold, hot, extremely cold and extremely hot conditions for the total population and its subgroups in EMT between 1999 and 2018.

|                         | <b>Total number of deaths</b> | <b>AN</b>             | <b>Extreme cold AF (95% eCI)</b> | <b>Extreme heat AF (95% eCI)</b> | <b>Moderate cold AF (95% eCI)</b> | <b>Moderate heat AF (95% eCI)</b> |
|-------------------------|-------------------------------|-----------------------|----------------------------------|----------------------------------|-----------------------------------|-----------------------------------|
| Total population        | 72123                         | 10035 (4847-14179)    | 0.90 (0.65-1.12)                 | 0.70 (0.52-0.88)                 | 7.61 (0.70-13.62)                 | 4.96 (3.16-6.66)                  |
| Males                   | 34526                         | 4841 (1497-7418)      | 0.74 (0.40-1.05)                 | 0.69 (0.45-0.95)                 | 7.45 (-2.81-15.88 )               | 5.38 (2.52-7.87)                  |
| Females                 | 37597                         | 5289 (1443 - 8641)    | 1.05 (0.69-1.37)                 | 0.72 (0.46-0.97)                 | 7.97 (-3.02-17.03)                | 4.60 (1.96-6.71)                  |
| Elderly (≥65 years old) | 65173                         | 9896 (5541-13783)     | 0.95 (0.70-1.18)                 | 0.78 (0.59-0.96)                 | 8.21 (1.23-14.73)                 | 5.55 (3.66-7.41)                  |
|                         |                               | Fraction of days* (%) | 1.08                             | 0.96                             | 64.42                             | 33.50                             |

\*based on the total population MMT

**Table S3:** MMT and cumulative relative risks of cardiorespiratory mortality for various lag intervals, considering constant exposure, under different models for the total population and its subgroups in EMT between 1999 and 2018.

|                     |                                 | qAIC     | Minimum Mortality Temperature (MMT, °C) | Minimum Mortality Percentile (MMP) | Relative Risk for extreme cold (95% CI) | Relative Risk for extreme heat (95% CI) | Relative Risk for moderate cold (95% CI) | Relative Risk for moderate heat (95% CI) |
|---------------------|---------------------------------|----------|-----------------------------------------|------------------------------------|-----------------------------------------|-----------------------------------------|------------------------------------------|------------------------------------------|
| Total population    | Main                            | 37507.46 | 20.9                                    | 65                                 | 1.74 (1.44-2.10)                        | 1.82 (1.52-2.18)                        | 1.19 (1.00-1.42)                         | 1.33 (1.20-1.48)                         |
|                     | Df/year for seasonal control: 4 | 37592.63 | 22.8                                    | 72                                 | 1.75 (1.50-2.03)                        | 1.30 (1.21-1.40)                        | 1.22 (1.07-1.39)                         | 1.11 (1.07-1.15)                         |
|                     | Df/year for seasonal control 9  | 37509.26 | 20.1                                    | 63                                 | 1.64 (1.36-1.97)                        | 1.99 (1.63-2.41)                        | 1.15 (0.97-1.37)                         | 1.41 (1.25-1.59)                         |
|                     | Lag period: 7 days              | 37626.22 | 21.2                                    | 66                                 | 1.32 (1.19-1.47)                        | 1.71 (1.55-1.89)                        | 1.11 (1.01-1.22)                         | 1.29 (1.21-1.36)                         |
|                     | Lag period: 14 days             | 37543    | 21.6                                    | 67                                 | 1.66 (1.43-1.92)                        | 1.73 (1.52-1.98)                        | 1.16 (1.01-1.33)                         | 1.28 (1.19-1.38)                         |
|                     | df/RH: 5                        | 37511.22 | 20.9                                    | 65                                 | 1.73 (1.44-2.09)                        | 1.82 (1.52-2.18)                        | 1.19 (1.00-1.42)                         | 1.33 (1.20-1.48)                         |
|                     | No RH                           | 37506.32 | 21.1                                    | 66                                 | 1.75 (1.45-2.11)                        | 1.77 (1.48-2.11)                        | 1.19 (1.00-1.42)                         | 1.31 (1.18-1.45)                         |
| Males               | Main                            | 31813.83 | 20.5                                    | 64                                 | 1.60 (1.23-2.08)                        | 1.88 (1.44-2.44)                        | 1.20 (0.94-1.53)                         | 1.36 (1.17-1.59)                         |
|                     | Df/year for seasonal control: 4 | 31839.05 | 22.6                                    | 71                                 | 1.66 (1.34-2.05)                        | 1.27 (1.14-1.41)                        | 1.16 (0.97-1.40)                         | 1.10 (1.05-1.16)                         |
|                     | Df/year for seasonal control 9  | 31820.08 | 20                                      | 63                                 | 1.53 (1.17-2.00)                        | 2.03 (1.54-2.69)                        | 1.21 (0.95-1.55)                         | 1.43 (1.20-1.71)                         |
|                     | Lag period: 7 days              | 31885.63 | 21.1                                    | 66                                 | 1.37 (1.18-1.59)                        | 1.63 (1.41-1.88)                        | 1.15 (1.01-1.32)                         | 1.26 (1.16-1.36)                         |
|                     | Lag period: 14 days             | 31844.04 | 21                                      | 66                                 | 1.60 (1.30-1.96)                        | 1.75 (1.44-2.12)                        | 1.14 (0.95-1.38)                         | 1.30 (1.16-1.46)                         |
|                     | df/RH: 5                        | 31817.47 | 20.5                                    | 64                                 | 1.60 (1.23-2.08)                        | 1.88 (1.44-2.45)                        | 1.20 (0.94-1.53)                         | 1.36 (1.17-1.59)                         |
|                     | No RH                           | 31811.56 | 20.7                                    | 65                                 | 1.61 (1.24-2.10)                        | 1.80 (1.39-2.33)                        | 1.21 (0.94-1.55)                         | 1.33 (1.15-1.55)                         |
| Females             | Main                            | 32622.82 | 21.5                                    | 67                                 | 1.88 (1.44-2.45)                        | 1.78 (1.39-2.27)                        | 1.19 (0.92-1.52)                         | 1.30 (1.14-1.50)                         |
|                     | Df/year for seasonal control: 4 | 32610.8  | 23                                      | 73                                 | 1.83 (1.49-2.26)                        | 1.32 (1.20-1.46)                        | 1.28 (1.07-1.53)                         | 1.12 (1.06-1.17)                         |
|                     | Df/year for seasonal control 9  | 32638.46 | 20.2                                    | 63                                 | 1.73 (1.33-2.24)                        | 1.94 (1.48-2.54)                        | 1.09 (0.86-1.39)                         | 1.39 (1.17-1.64)                         |
|                     | Lag period: 7 days              | 32712.96 | 21.1                                    | 66                                 | 1.29 (1.11-1.49)                        | 1.79 (1.56-2.05)                        | 1.07 (0.94-1.22)                         | 1.31 (1.21-1.42)                         |
|                     | Lag period: 14 days             | 32655.26 | 22.1                                    | 69                                 | 1.73 (1.40-2.13)                        | 1.72 (1.44-2.06)                        | 1.18 (0.98-1.43)                         | 1.26 (1.15-1.39)                         |
|                     | df/RH: 5                        | 32626.12 | 21.4                                    | 67                                 | 1.87 (1.43-2.44)                        | 1.77 (1.39-2.27)                        | 1.18 (0.92-1.52)                         | 1.30 (1.13-1.49)                         |
|                     | No RH                           | 32618.2  | 21.5                                    | 67                                 | 1.88 (1.44-2.45)                        | 1.74 (1.37-2.22)                        | 1.19 (0.92-1.52)                         | 1.29 (1.13-1.47)                         |
| Elderly (≥65 years) | Main                            | 36778.92 | 20.7                                    | 65                                 | 1.81 (1.49-2.20)                        | 1.94 (1.60-2.36)                        | 1.22 (1.02-1.47)                         | 1.38 (1.23-1.54)                         |

|  |                                 |          |      |    |                  |                  |                  |                  |
|--|---------------------------------|----------|------|----|------------------|------------------|------------------|------------------|
|  | Df/year for seasonal control: 4 | 36850.44 | 22.8 | 72 | 1.77 (1.51-2.07) | 1.33 (1.23-1.44) | 1.22 (1.06-1.40) | 1.12 (1.08-1.16) |
|  | Df/year for seasonal control 9  | 36784.25 | 19.9 | 62 | 1.69 (1.39-2.06) | 2.12 (1.72-2.60) | 1.19 (1.00-1.43) | 1.46 (1.28-1.67) |
|  | Lag period: 7 days              | 36896.11 | 21   | 66 | 1.34 (1.20-1.50) | 1.80 (1.61-2.00) | 1.11 (1.00-1.22) | 1.32 (1.24-1.41) |
|  | Lag period: 14 days             | 36814.53 | 21.4 | 67 | 1.69 (1.45-1.97) | 1.83 (1.59-2.11) | 1.16 (1.01-1.34) | 1.32 (1.22-1.43) |
|  | df/RH: 5                        | 36782.74 | 20.7 | 65 | 1.80 (1.48-2.19) | 1.94 (1.60-2.36) | 1.22 (1.02-1.46) | 1.38 (1.23-1.54) |
|  | No RH                           | 36777.75 | 20.8 | 65 | 1.81 (1.49-2.21) | 1.89 (1.56-2.28) | 1.22 (1.02-1.47) | 1.36 (1.22-1.51) |

**Table S4:** The number of cardiorespiratory deaths (AN) attributed to air temperature and the fraction of cardiorespiratory mortality (AF) attributed to cold, hot, extremely cold and extremely hot conditions under different models for the total population and its subgroups in EMT between 1999 and 2018.

|                  |                                 | <b>AN</b>             | <b>Extreme cold AF (95% eCI)</b> | <b>Extreme heat AF (95% eCI)</b> | <b>Moderate cold AF (95% eCI)</b> | <b>Moderate heat AF (95% eCI)</b> |
|------------------|---------------------------------|-----------------------|----------------------------------|----------------------------------|-----------------------------------|-----------------------------------|
| Total population | Main                            | 10035 (4847. - 14179) | 0.9 (0.65-1.12)                  | 0.7 (0.52-0.88)                  | 7.61 (0.70-13.62)                 | 4.96 (3.16-6.66)                  |
|                  | Df/year for seasonal control: 4 | 9015 (5340-12339)     | 0.89 (0.69-1.09)                 | 0.35 (0.26-0.42)                 | 9.52 (4.08-14.54)                 | 1.9 (1.25-2.51)                   |
|                  | Df/year for seasonal control 9  | 9428 (4863-13642)     | 0.81 (0.56-1.05)                 | 0.78 (0.58-0.97)                 | 5.76 (-1.16-11.75)                | 5.98 (3.64-8.12)                  |
|                  | Lag period: 7 days              | 8097 (5230-10725)     | 0.46 (0.31-0.59)                 | 0.63 (0.53-0.72)                 | 5.84 (1.45-9.82)                  | 4.4 (3.44-5.40)                   |
|                  | Lag period: 14 days             | 9711 (5757-13369)     | 0.84 (0.65-1.02)                 | 0.65 (0.51-0.78)                 | 7.89 (2.32-13.14)                 | 4.29 (3.03-5.53)                  |
|                  | df/RH: 5                        | 9982 (4950 -14009)    | 0.89 (0.66-1.11)                 | 0.70 (0.50-0.88)                 | 7.54 (0.00-14.21)                 | 4.96 (3.19-6.64)                  |
|                  | No RH                           | 9952 (4939 -14432)    | 0.90 (0.66-1.12)                 | 0.67 (0.50-0.86)                 | 7.78 (1.00-14.15)                 | 4.69 (2.88-6.14)                  |
| Males            | Main                            | 4841 (1497-7418)      | 0.74 (0.40-1.05)                 | 0.69 (0.45-0.95)                 | 7.45 (-2.81-15.88)                | 5.38 (2.52-7.87)                  |
|                  | Df/year for seasonal control: 4 | 3483 (77-3-57589)     | 0.81 (0.52-1.07)                 | 0.29 (0.17-0.40)                 | 7.30 (-0.72-14.11)                | 1.80 (0.89-2.71)                  |
|                  | Df/year for seasonal control 9  | 5112 (1892-7634)      | 0.66 (0.30-0.96)                 | 0.76 (0.48-1.01)                 | 7.43 (-2.52-15.86)                | 6.22 (2.70-8.86)                  |
|                  | Lag period: 7 days              | 4108 (2163-5726)      | 0.48 (0.26-0.66)                 | 0.54 (0.38-0.66)                 | 6.96 (0.67-12.23)                 | 4.00 (2.58-5.47)                  |
|                  | Lag period: 14 days             | 4198 (1580-6477)      | 0.76 (0.48-1.03)                 | 0.61 (0.42-0.79)                 | 6.38 (-1.35-12.91)                | 4.58 (2.51-6.52)                  |
|                  | df/RH: 5                        | 4821 (1519-7540)      | 0.73 (0.37-1.04)                 | 0.69 (0.43-0.94)                 | 7.38 (-3.06-15.90)                | 5.40 (2.55-7.98)                  |
|                  | No RH                           | 4776 (1168-7489)      | 0.74 (0.42-1.05)                 | 0.65 (0.39-0.90)                 | 7.66 (-2.17-16.82)                | 5.00 (2.34-7.42)                  |
| Females          | Main                            | 5289 (1443-8641)      | 1.05 (0.69-1.37)                 | 0.72 (0.46-0.97)                 | 7.97 (-3.02-17.03)                | 4.60 (1.96-6.71)                  |
|                  | Df/year for seasonal control: 4 | 5499 (2863-7532)      | 0.96 (0.67-1.22)                 | 0.41 (0.28-0.52)                 | 11.46 (4.2-17.97)                 | 1.99 (1.15-2.82)                  |
|                  | Df/year for seasonal control 9  | 493 (532-7151)        | 0.95 (0.59-1.27)                 | 0.80 (0.53-1.05)                 | 4.18 (-6.64-12.95)                | 5.73 (2.76-8.60)                  |
|                  | Lag period: 7 days              | 414 (1974-5782)       | 0.44 (0.23-0.62)                 | 0.72 (0.56-0.85)                 | 4.88 (-0.96-10.41)                | 4.73 (3.27-6.03)                  |
|                  | Lag period: 14 days             | 5646 (2681-8327)      | 0.91 (0.63-1.15)                 | 0.69 (0.48-0.86)                 | 9.57 (0.54-17.19)                 | 4.07 (2.41-5.56)                  |

|                     |                                 |                   |                  |                  |                    |                  |
|---------------------|---------------------------------|-------------------|------------------|------------------|--------------------|------------------|
|                     | df/RH: 5                        | 5258 (1306-8392)  | 1.04 (0.69-1.36) | 0.71 (0.45-0.95) | 7.91 (-3.2-17.98)  | 4.59 (2.16-6.82) |
|                     | No RH                           | 5267 (1287-8407)  | 1.05 (0.72-1.38) | 0.70 (0.45-0.94) | 8.11 (-2.58-16.84) | 4.42 (1.98-6.63) |
| Elderly (≥65 years) | Main                            | 9897 (5543-13783) | 0.95 (0.70-1.18) | 0.78 (0.59-0.96) | 8.21 (1.23-14.73)  | 5.55 (3.66-7.41) |
|                     | Df/year for seasonal control: 4 | 8486 (4944-11735) | 0.92 (0.71-1.13) | 0.39 (0.30-0.47) | 9.68 (4.61-15.14)  | 2.09 (1.45-2.73) |
|                     | Df/year for seasonal control 9  | 9584 (5300-13438) | 0.85 (0.56-1.08) | 0.86 (0.63-1.05) | 6.72 (-0.04-13.03) | 6.59 (4.24-8.77) |
|                     | Lag period: 7 days              | 7543 (4720-10115) | 0.49 (0.33-0.62) | 0.70 (0.58-0.79) | 5.68 (1.50-9.96)   | 4.84 (3.73-5.82) |
|                     | Lag period: 14 days             | 9107 (5615-12407) | 0.88 (0.67-1.06) | 0.72 (0.56-0.85) | 7.82 (1.53-13.10)  | 4.79 (3.48-6.03) |
|                     | df/RH: 5                        | 9850 (5335-13698) | 0.95 (0.71-1.20) | 0.78 (0.57-0.96) | 8.14 (1.57-14.66)  | 5.56 (3.61-7.38) |
|                     | No RH                           | 9812 (5446-13869) | 0.95 (0.70-1.17) | 0.75 (0.57-0.94) | 8.36 (0.29-15.06)  | 5.29 (3.49-7.00) |

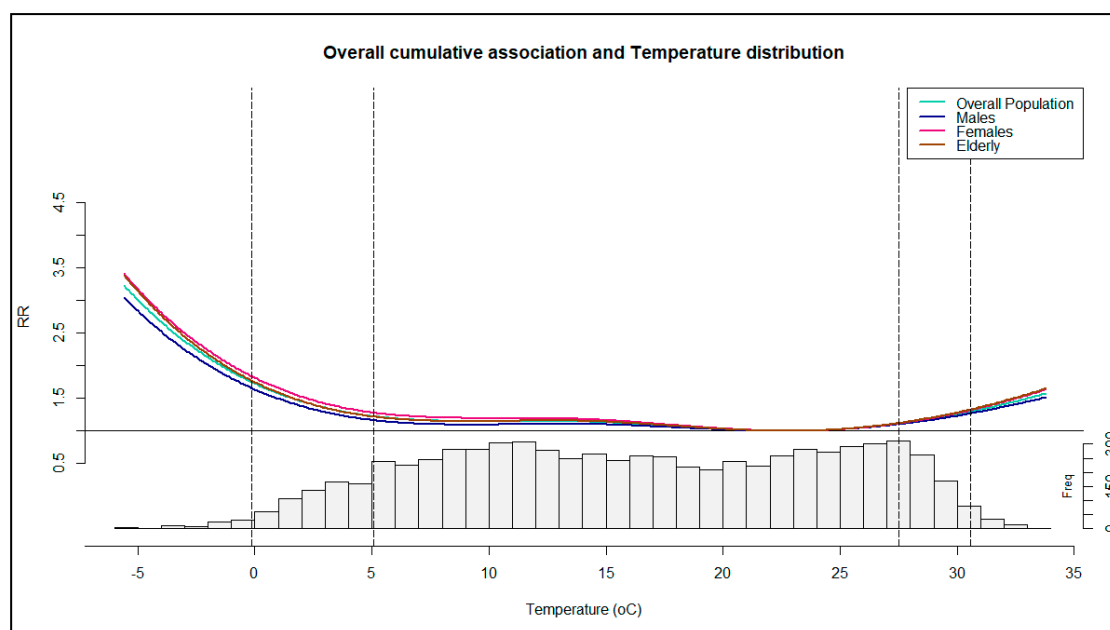

Fig. S3 The overall cumulative exposure-response curve of the mean daily temperature for the total population and its subgroups in EMT, for a lag period of 21 days with the related temperature distribution considering 4 Df/year for seasonal control.

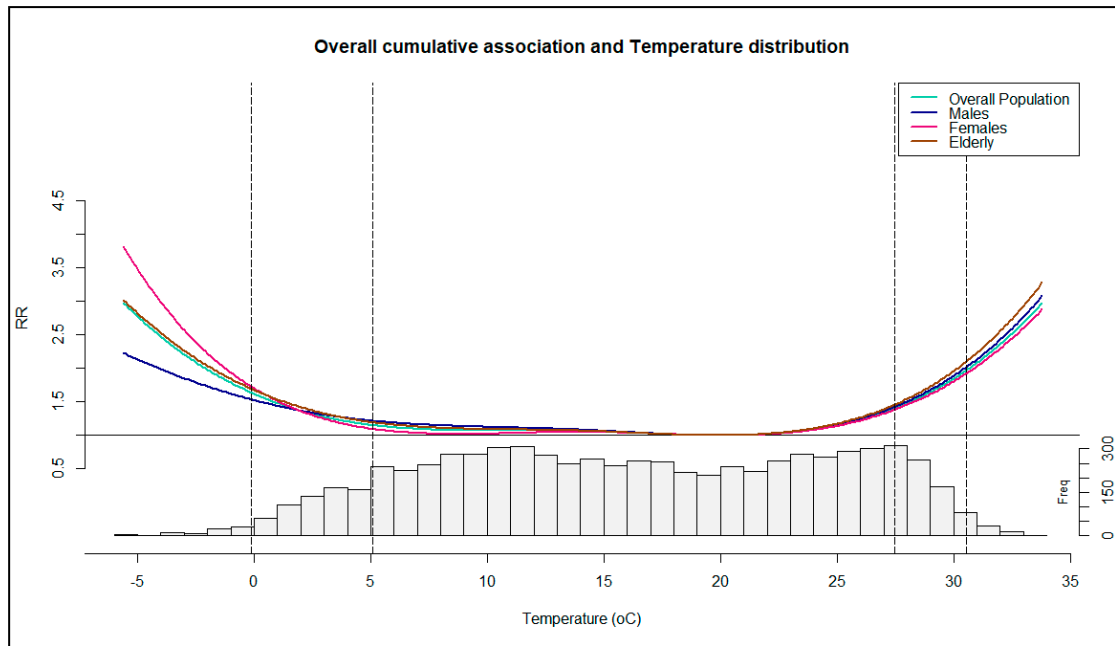

Fig. S4 The overall cumulative exposure-response curve of the mean daily temperature for the total population and its subgroups in EMT, for a lag period of 21 days with the related temperature distribution considering 9 Df/year for seasonal control.

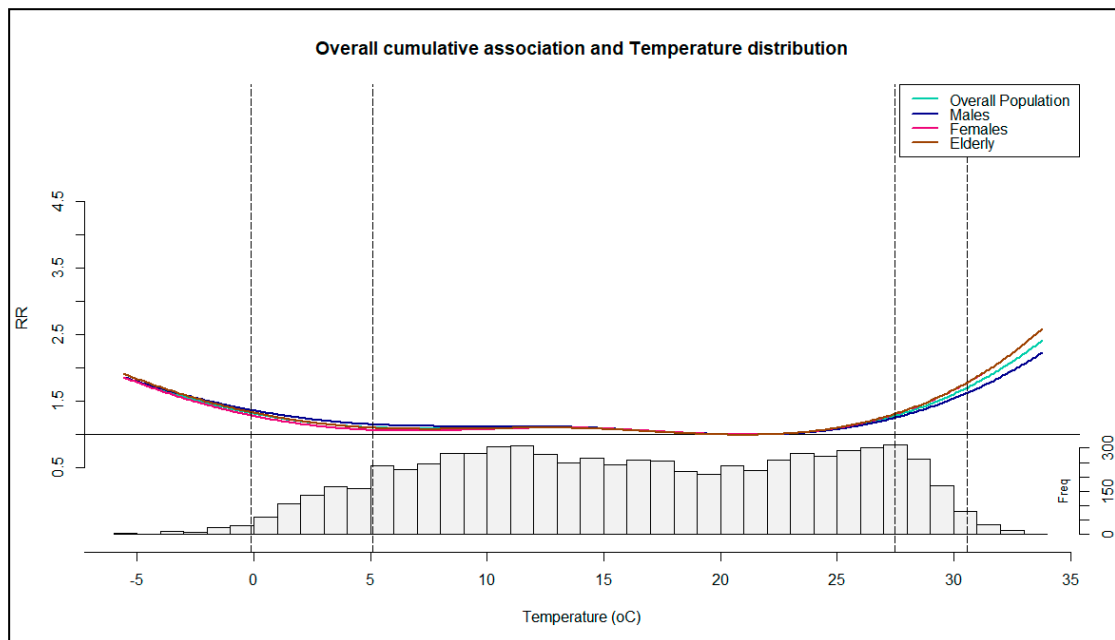

Fig. S5 The overall cumulative exposure-response curve of the mean daily temperature for the total population and its subgroups in EMT, for a lag period of 7 days with the related temperature distribution.

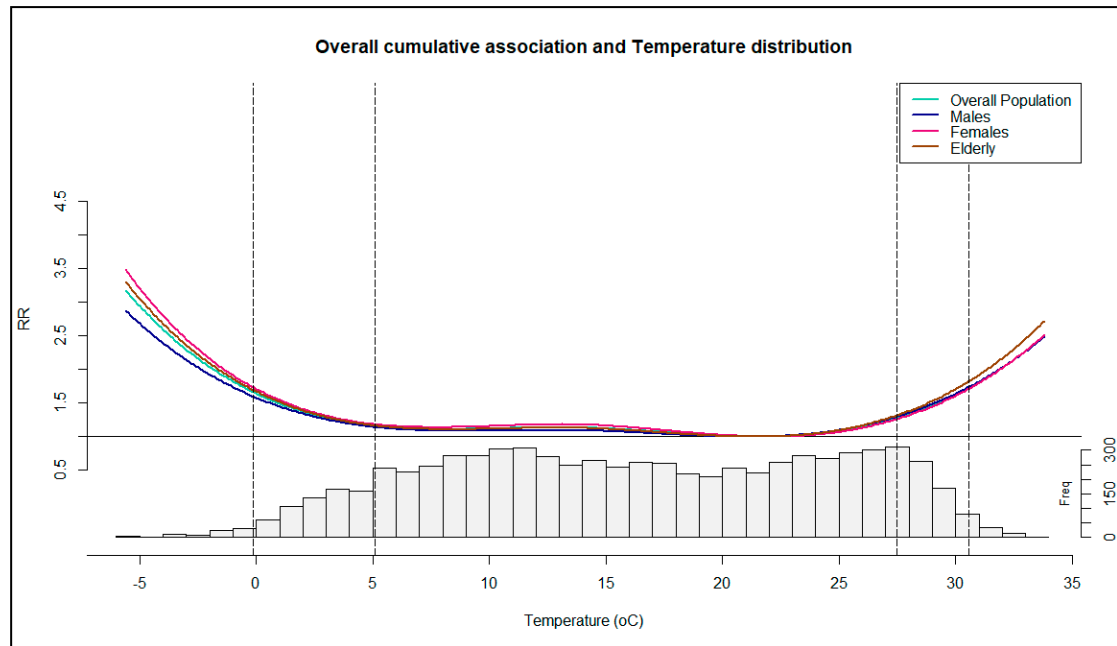

Fig. S6 The overall cumulative exposure-response curve of the mean daily temperature for the total population and its subgroups in EMT, for a lag period of 14 days with the related temperature distribution.

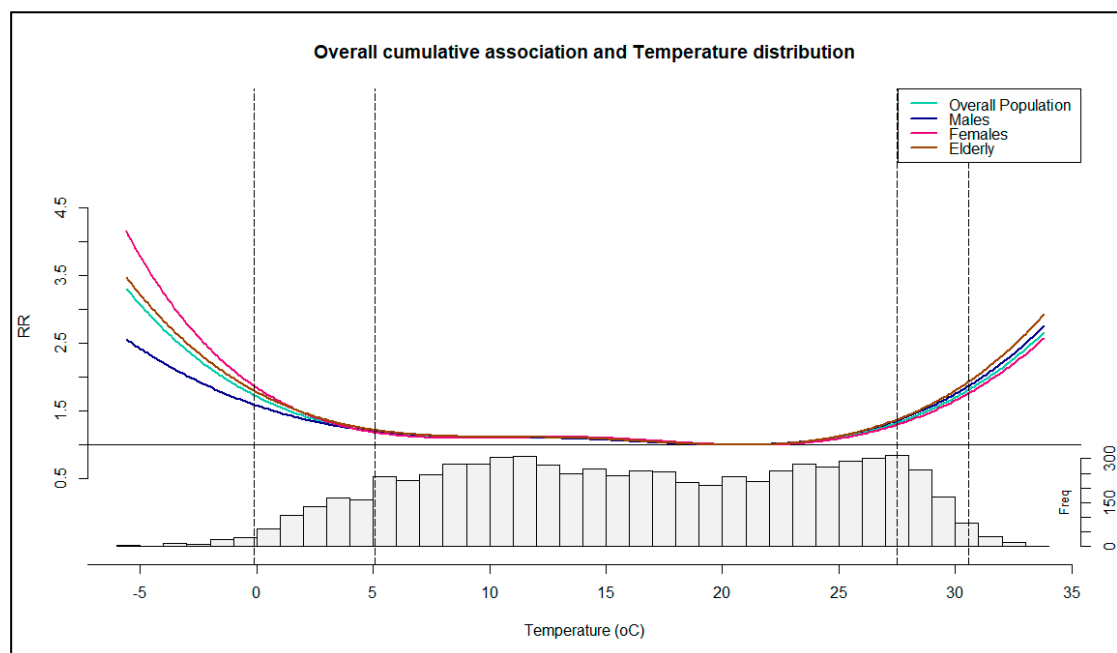

Fig. S7 The overall cumulative exposure-response curve of the mean daily temperature for the total population and its subgroups in EMT, for a lag period of 21 days with the related temperature distribution considering 5Df for relative humidity.

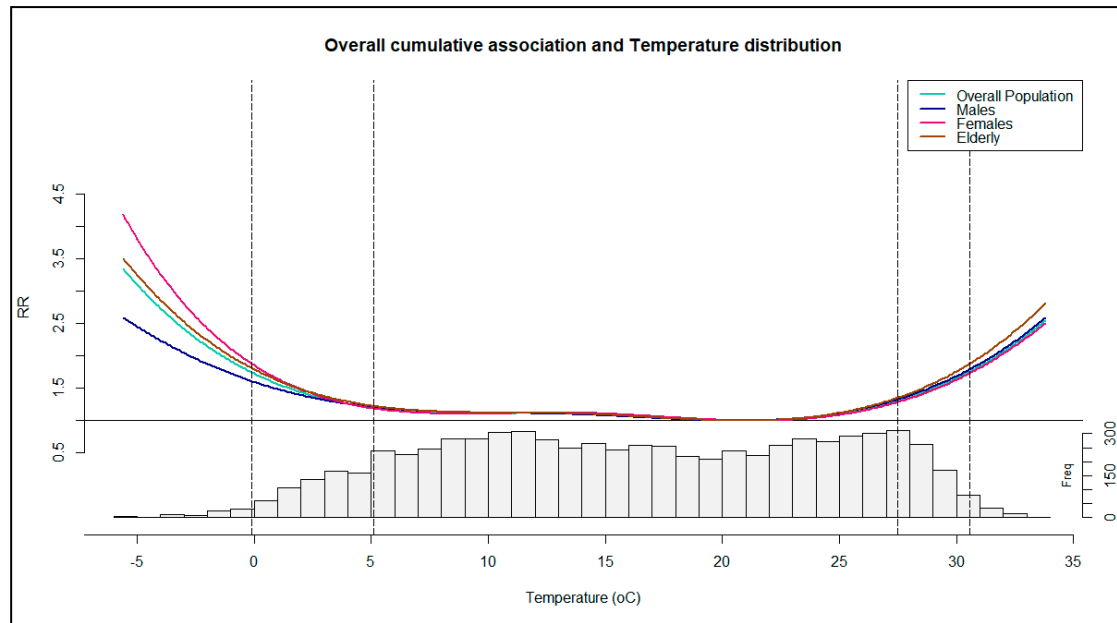

Fig. S8 The overall cumulative exposure-response curve of the mean daily temperature for the total population and its subgroups in EMT, for a lag period of 21 days with the related temperature distribution considering no relative humidity effect.
